# Supplementary material for: Sonochemically synthesized black phosphorus nanoparticles: a promising candidate for piezocatalytic antibacterial activity with enhanced dielectric properties
Source: Royal Society of Chemistry journal article supplement (doi:10.1039/d4dt00166d), 2024-01-01
Supplement: d4dt00166d1.pdf [file d4dt00166d1.pdf]

## Sonochemically Synthesized Black Phosphorous Nanoparticles: A Promising Candidate for Piezocatalytic Antibacterial Activity with Enhanced Dielectric Properties

Piyali Halder<sup>a</sup>, Indrajit Mondal<sup>a</sup>, Neelanjana Bag<sup>a</sup>, Alapan Pal<sup>a</sup>, Somen Biswas<sup>a, b</sup>, Souvik Sau<sup>a, b</sup>, Biplab Kumar Paul<sup>c</sup>, Dheeraj Mondal<sup>\*d</sup>, Brajadulal Chattopadhyay<sup>\*a</sup>, Sukhen Das<sup>\*a</sup>

<sup>a</sup> Department of Physics, Jadavpur University, Kolkata-700032, India.

<sup>b</sup> Department of Physics, Bangabasi College, Kolkata-700009, India.

<sup>c</sup> University of Engineering and Management, Kolkata-700160, India

<sup>d</sup> Department of Physics, Nabagram Hiralal Paul College, Hoogly-712246, India.

### \*Address for Correspondence

[sdasphysics@gmail.com](mailto:sdasphysics@gmail.com)

[bdc\\_physics@yahoo.co.in](mailto:bdc_physics@yahoo.co.in)

[dheerajphysics92@gmail.com](mailto:dheerajphysics92@gmail.com)

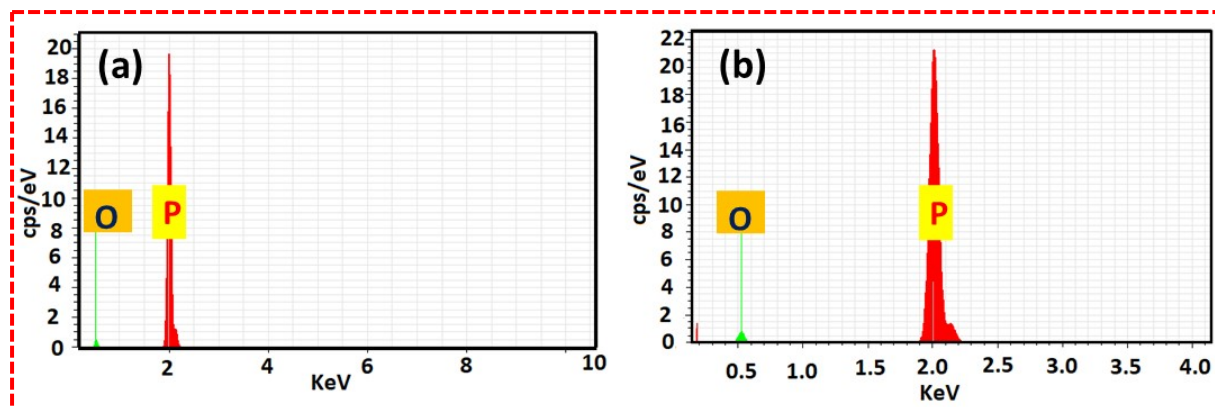

Figure S1(a-b): EDX Spectra of TABP and SCBP sample.

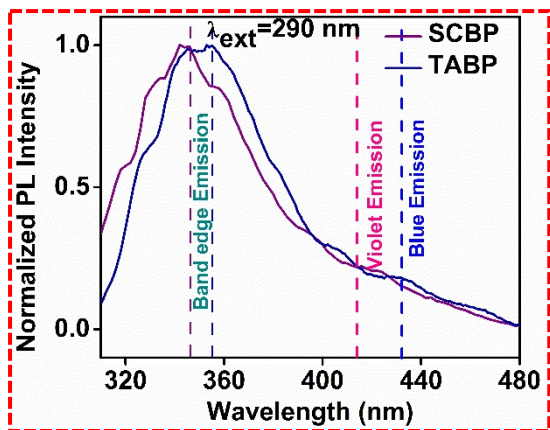

Figure S2: Normalized PL Intensity as a function of wavelength
